# Supplementary material for: Carbonate-assisted hydrothermal synthesis of porous, hierarchical CuO microspheres and CuO/GO for high-performance lithium-ion battery anodes
Source: Royal Society of Chemistry journal article supplement (doi:10.1039/c5ra16128b), 2015-01-01
Supplement: c5ra16128b1.pdf [file c5ra16128b1.pdf]

## Supporting Information

### Carbonate-assisted hydrothermal synthesis of porous, hierarchical CuO microspheres and CuO/GO for high-performance lithium-ion battery anodes

Lin Shi, Xinxin Fu, Chenyao Fan, Siqi Yu, Guodong Qian and Zhiyu Wang\*

State Key Laboratory of Silicon Materials, School of Materials Science and Engineering, Zhejiang University, Hangzhou 310027, China.

E-mail: [wangzhiyu@zju.edu.cn](mailto:wangzhiyu@zju.edu.cn);

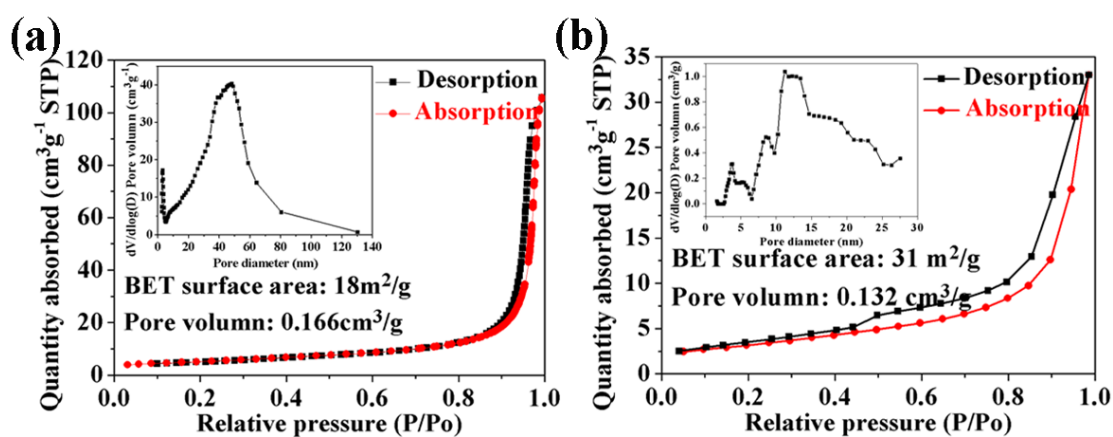

Fig. S1 Nitrogen adsorption-desorption isotherm curve and BJH pore size distribution plot (inset) of (a) bare CuO MSs and (b) CuO/GO hybrid.

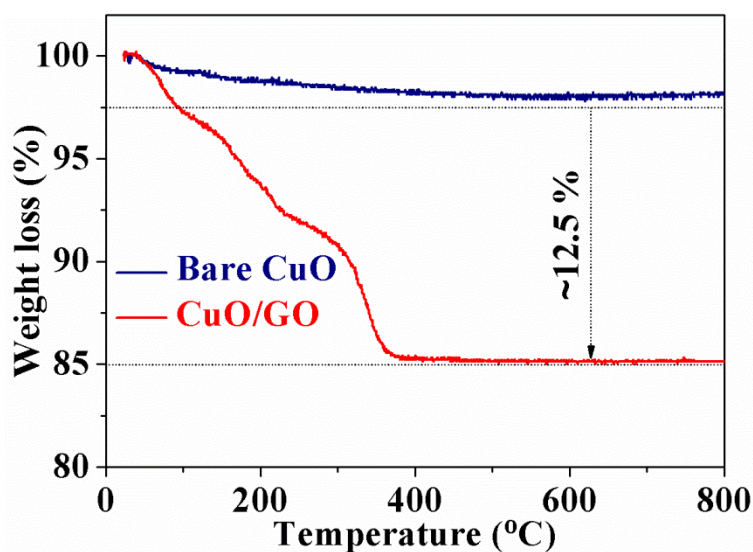

Fig. S2 TGA curves of bare CuO and CuO/GO hybrid from room temperature to 800 °C in air.

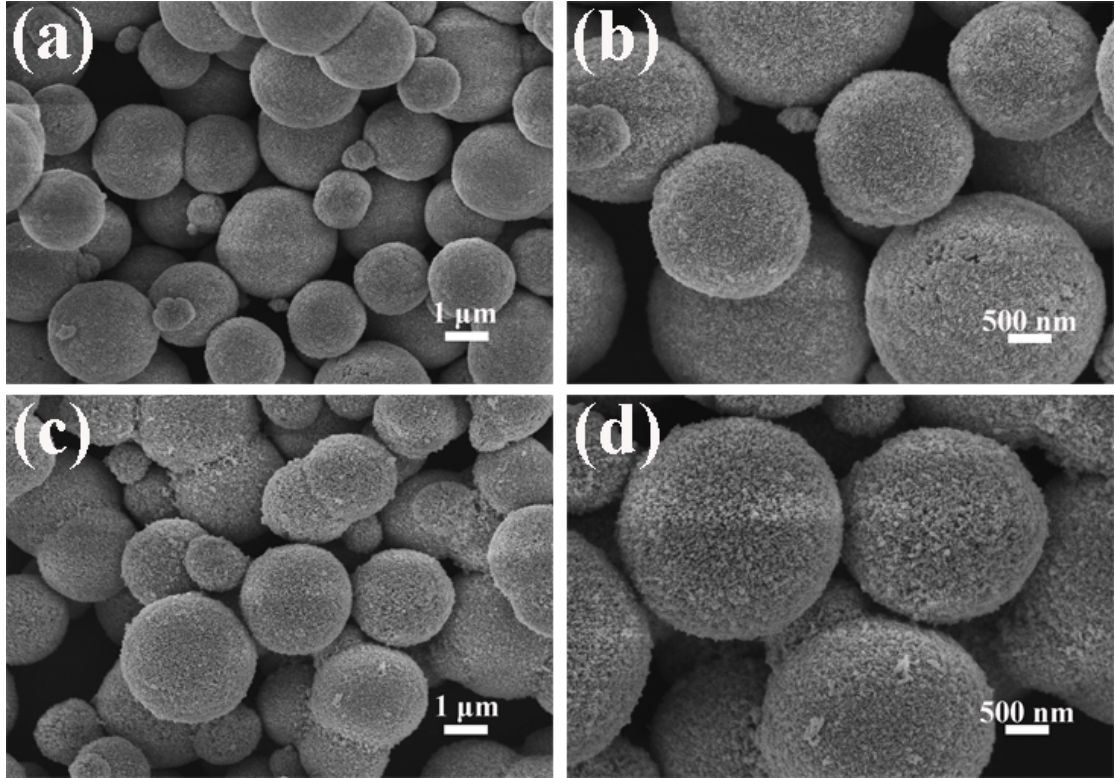

**Fig. S3** SEM images of CuO synthesized under different hydrothermal temperature for 4 h: (a, b) 120 °C; (c, d) 160 °C.

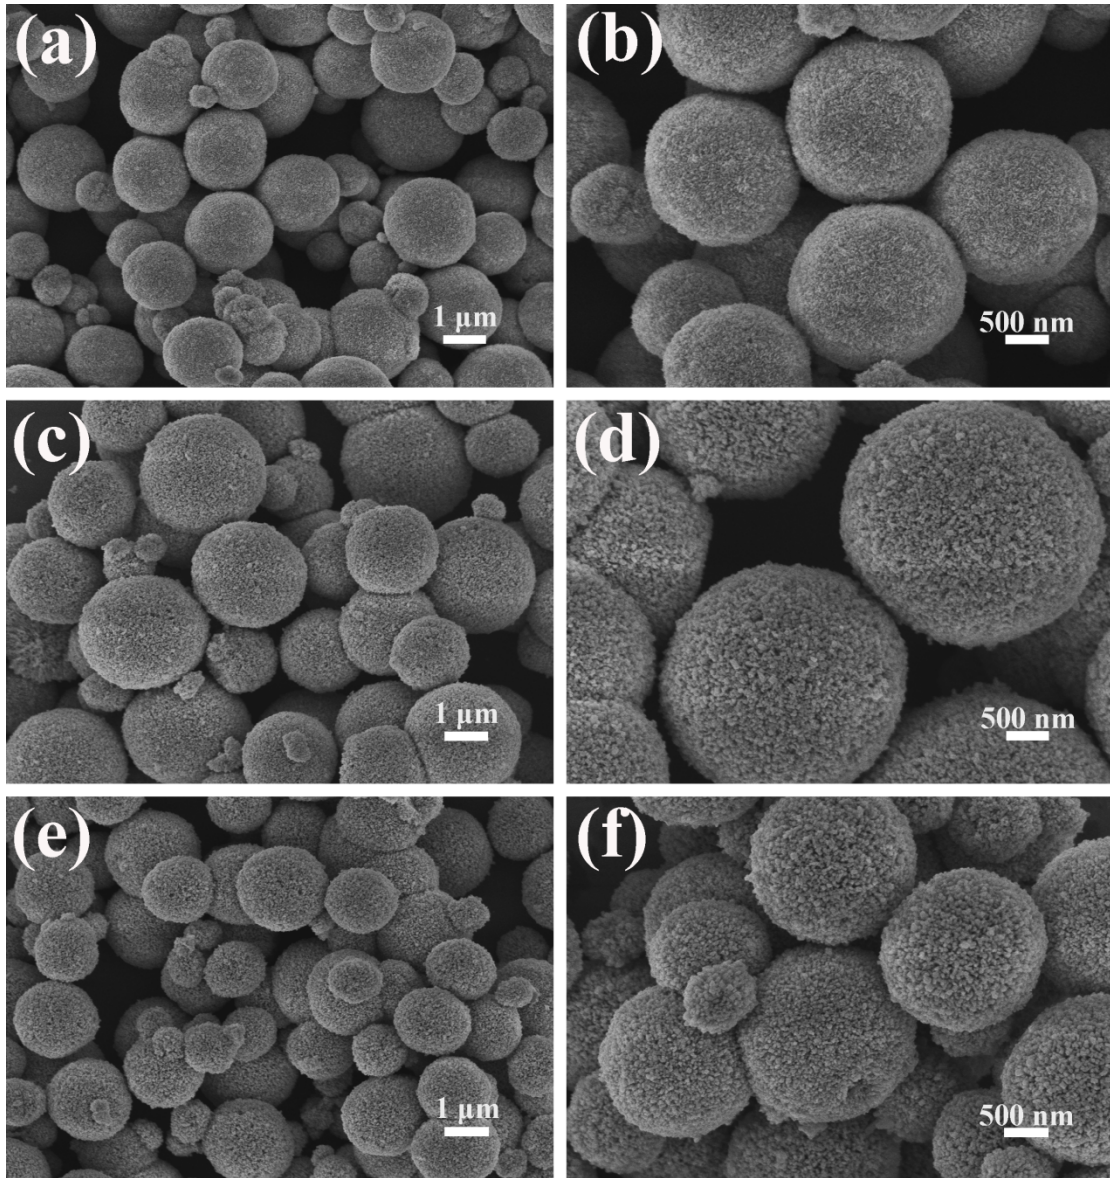

**Fig. S4** SEM images of CuO synthesized under 200 °C for different times: (a, b) 0.5 h; (c, d) 1 h; (e, f) 2 h.

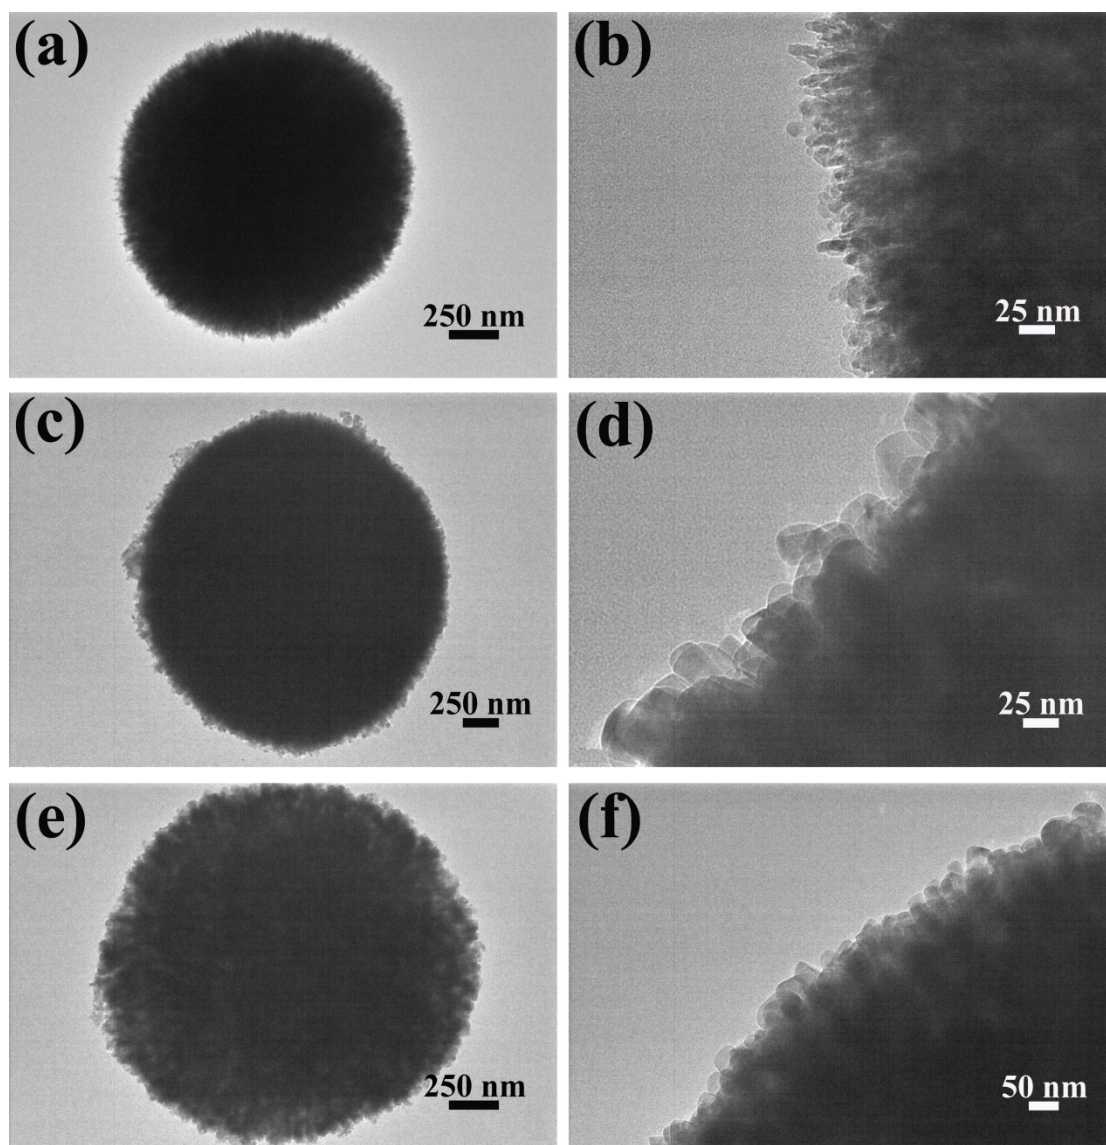

**Fig. S5** TEM images of CuO synthesized under 200 °C for different times: (a, b) 0.5 h; (c, d) 1 h; (e, f) 2 h.

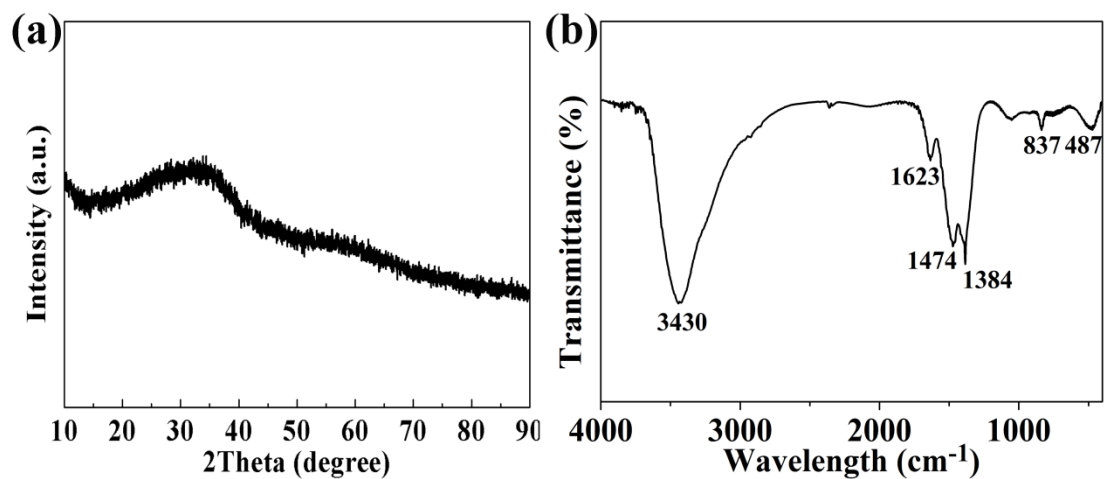

Fig. S6 XRD pattern of the precursor before hydrothermal treatment.

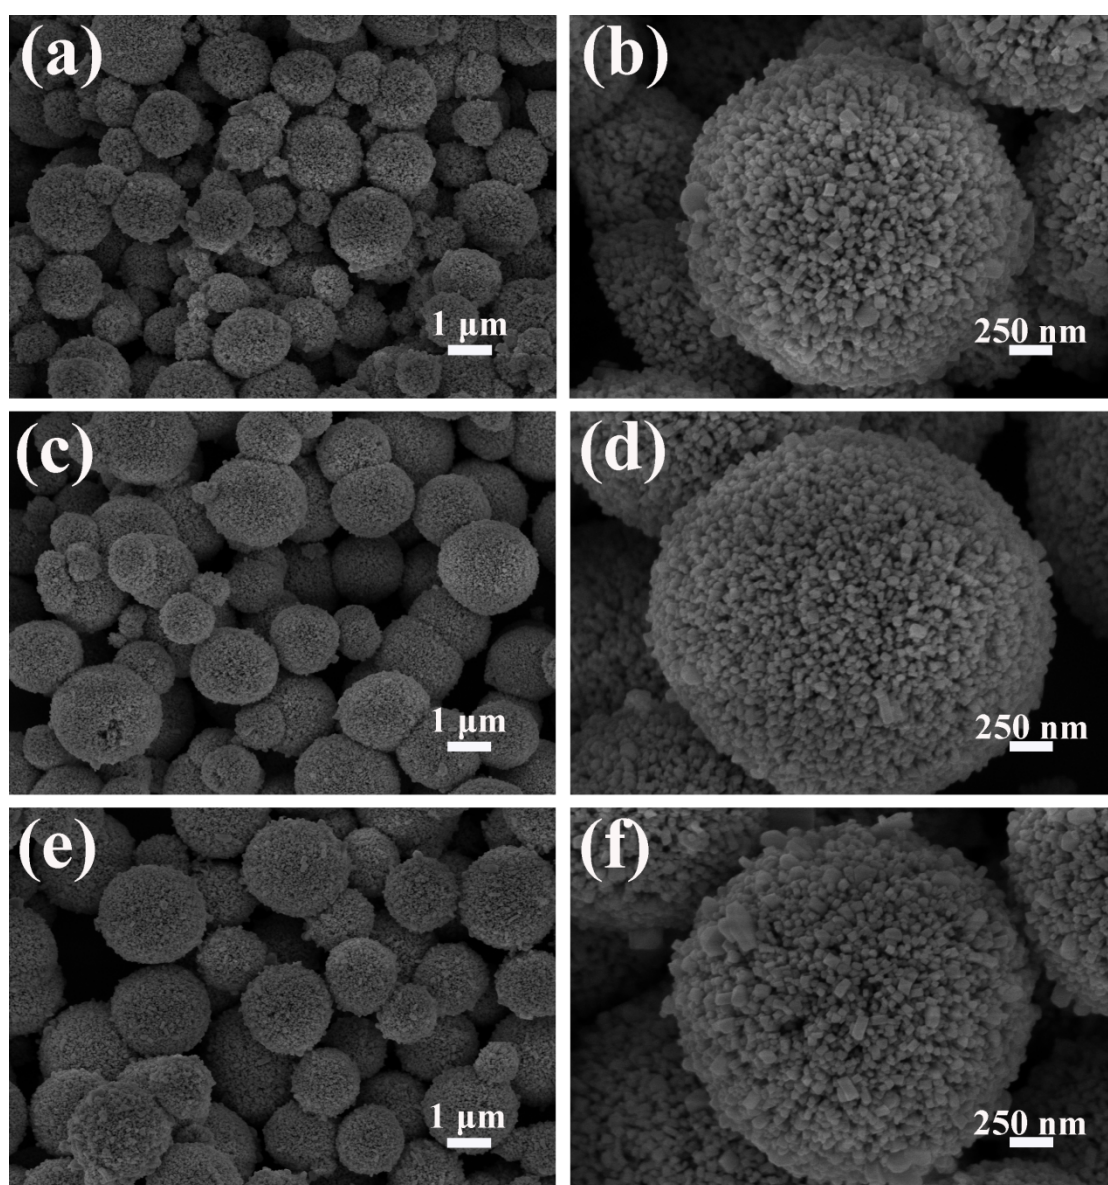

Fig. S7 SEM images of CuO synthesized from different copper salts: (a, b) CuCl<sub>2</sub>; (c, d) Cu(NO<sub>3</sub>)<sub>2</sub>; (e, f) Cu(CH<sub>3</sub>COO)<sub>2</sub>.
